# Supplementary material for: Thermodynamics and kinetics in van der Waals epitaxial growth of Te
Source: Royal Society of Chemistry journal article supplement (doi:10.1039/d4nr05266h), 2025-01-01
Supplement: d4nr05266h1.pdf [file d4nr05266h1.pdf]

## Supporting Information For:

### Thermodynamics and Kinetics in van der Waals Epitaxial Growth of Te

Taotao Li<sup>1,4,#</sup>, Wenjin Gao<sup>1,2,#</sup>, Yongsong Wang<sup>1,5,#</sup>, Tianzhao Li<sup>1,2</sup>, Guoxiang Zhi<sup>3</sup>,  
Miao Zhou<sup>\*,1,2,3</sup>, and Tianchao Niu<sup>\*,1</sup>

<sup>1</sup>Hangzhou International Innovation Institute, Beihang University, Hangzhou 311115, China

<sup>2</sup>School of Physics, Beihang University, Beijing 100191, China

<sup>3</sup>Tianmushan Laboratory, Hangzhou 310023, China

<sup>4</sup>Key Laboratory of Intelligent Manufacturing Quality Big Data Tracing and Analysis of Zhejiang Province, College of Science, China Jiliang University, Hangzhou 310018, China

<sup>5</sup>Donostia International Physics Center (DIPC), Paseo Manuel de Lardizábal 4, 20018, San Sebastián, Spain

<sup>#</sup>T.L., W.G. and Y.W. contributed equally.

<sup>\*</sup>Email: mzhou@buaa.edu.cn (M.Z.), tcniu@buaa.edu.cn (T.N.)

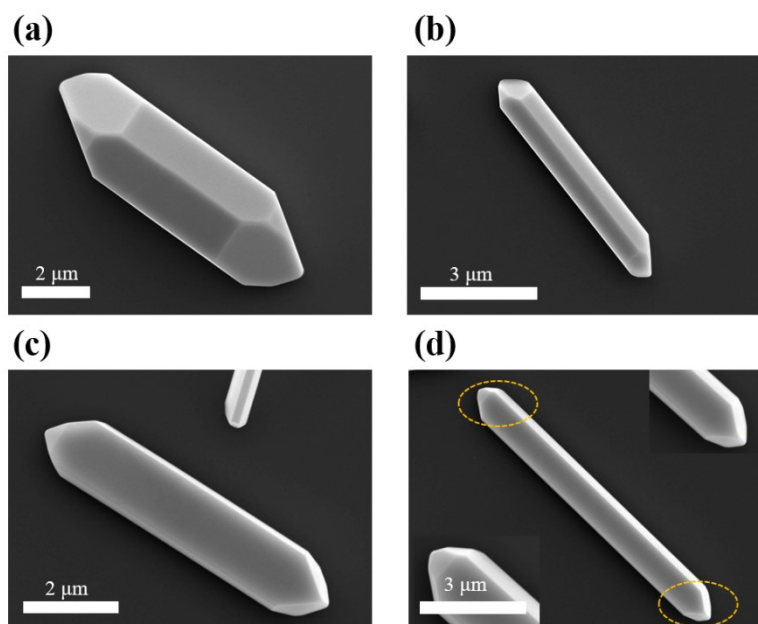

**Figure S1.** SEM images of CVD Te nanorods.

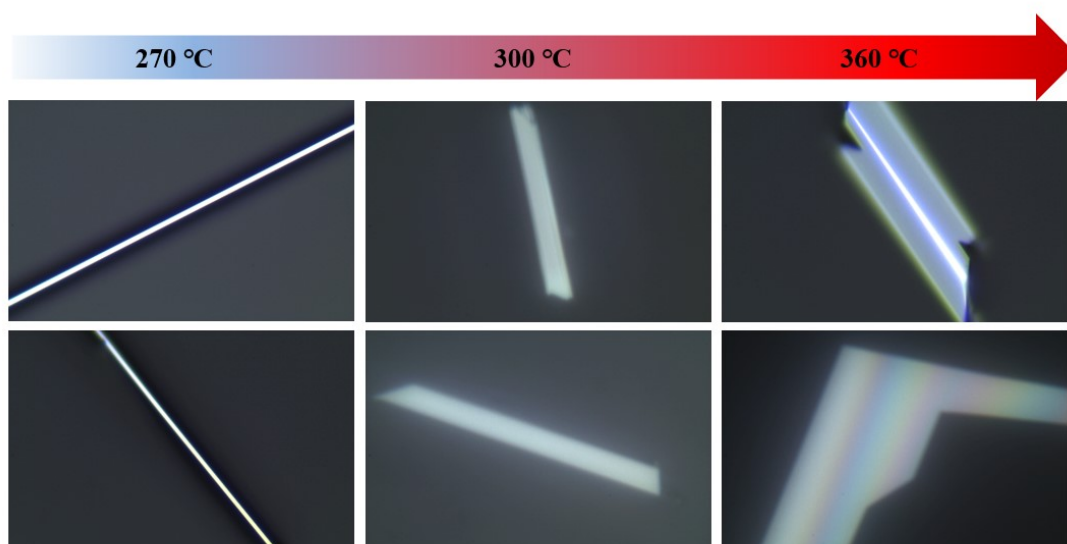

**Figure S2.** Optical images of CVD 1D and 2D Te crystals grown at different temperature on mica substrate.

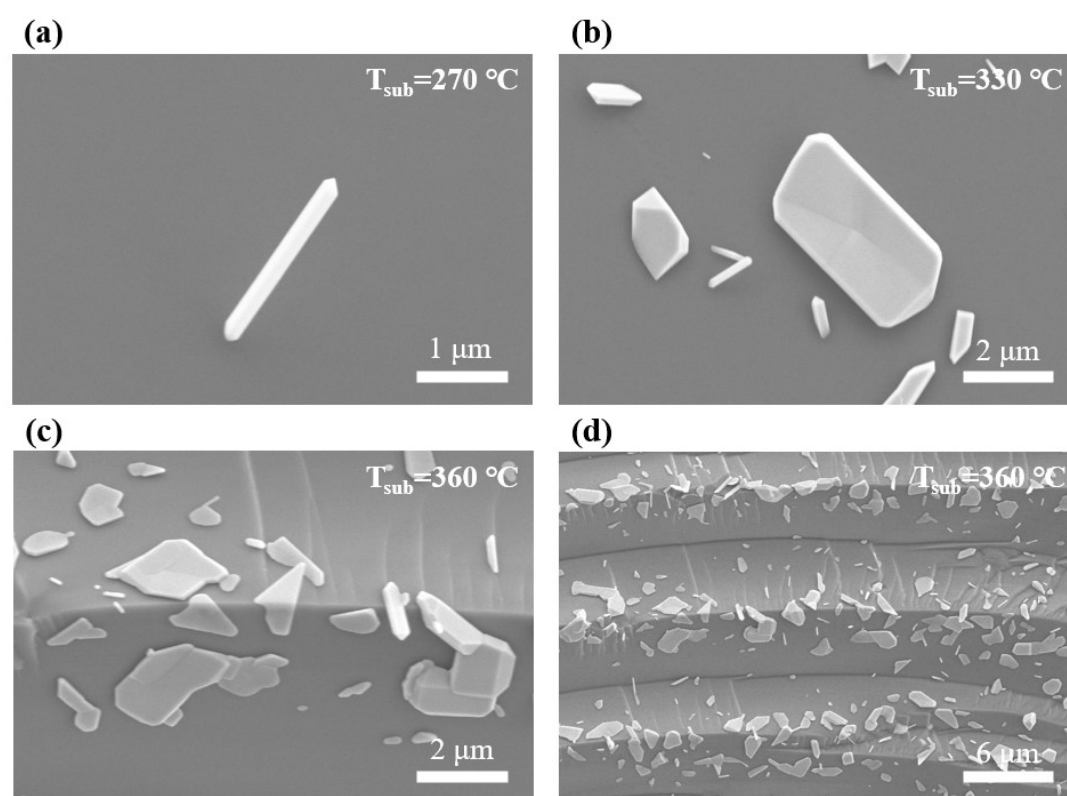

**Figure S3.** SEM images of CVD (a) 1D and (b-d) 2D Te crystals grown at different temperature on Si substrate.

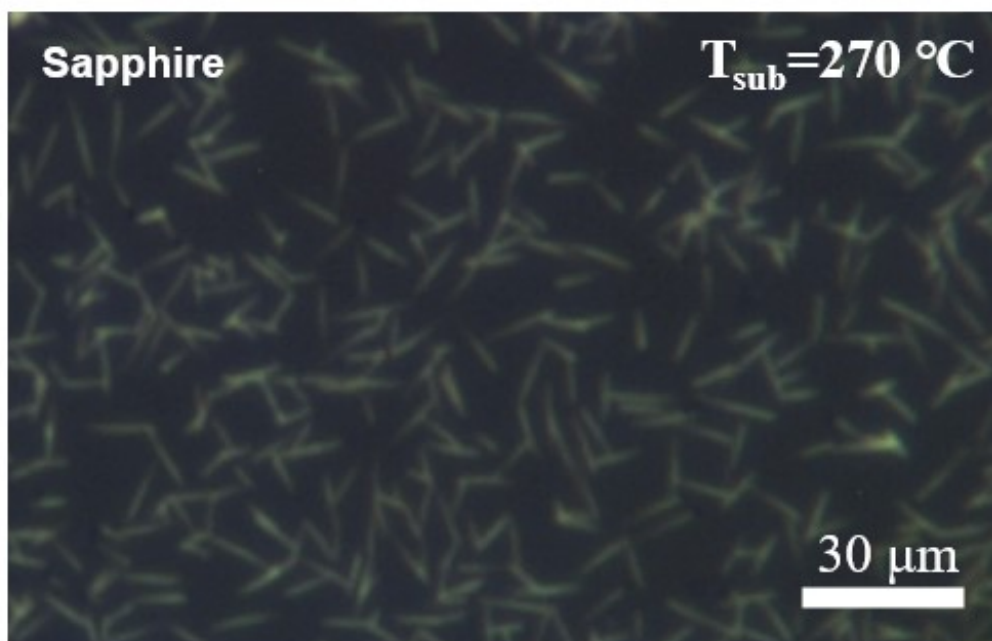

**Figure S4.** Optical image of CVD Te nanowires grown at 270 °C on sapphire substrate.

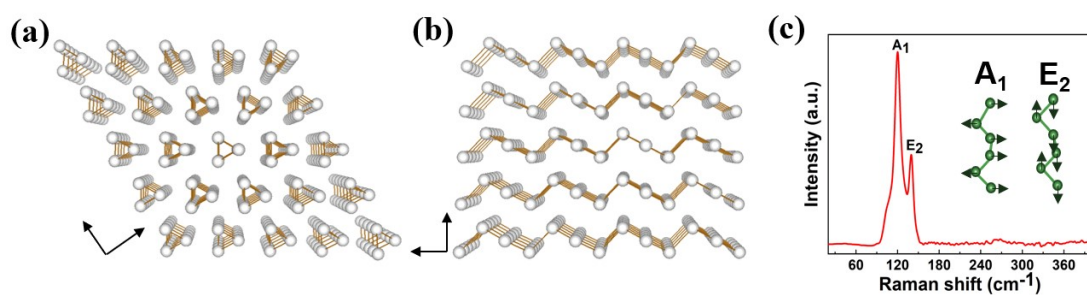

**Figure S5.** (a-b) Schematic illustration of Te crystal structure. (c) Raman spectrum of bulk Te synthesized via CVD on mica substrate. Inset is the A<sub>1</sub> and E<sub>2</sub> vibrational modes.

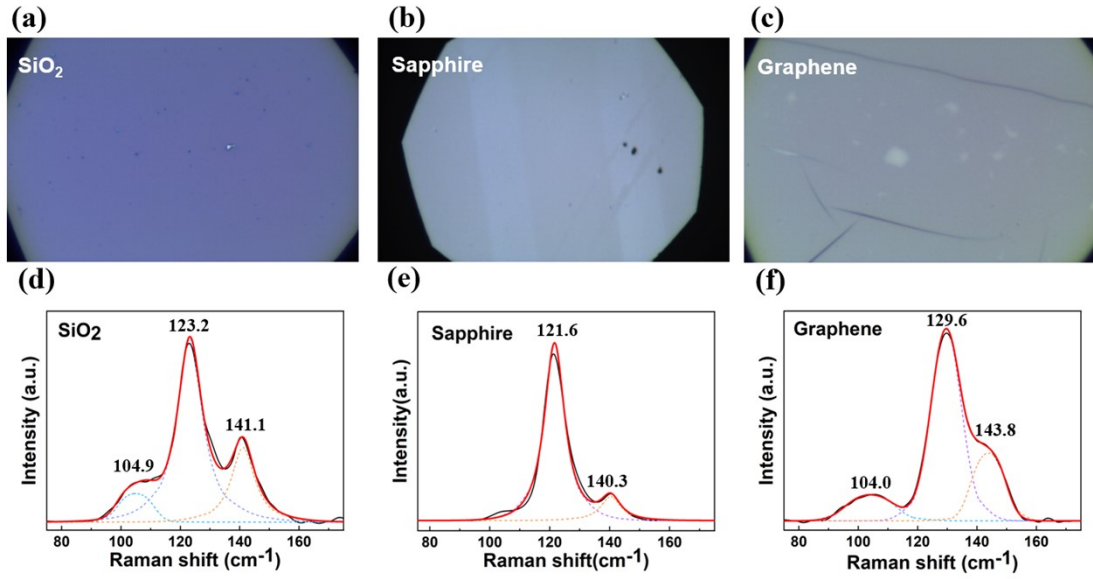

**Figure S6.** (a-c) Optical images of MBE Te films grown at 120 K on SiO<sub>2</sub>, sapphire, graphene substrate. (d-f) The corresponding Raman spectra are shown below. The original Raman data is represented by the black solid line. The fitted data is represented by the red solid line. The E<sub>1</sub>-LO peak is shown as the blue dashed line, the A<sub>1</sub> peak as the purple dashed line, and the E<sub>2</sub> peak as the yellow line.

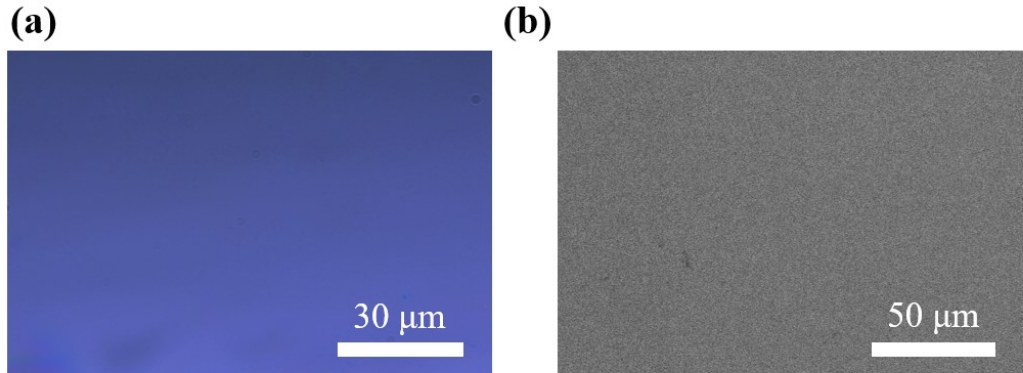

**Figure S7.** (a) Optical and (b) SEM images of the sample grown in MBE at T<sub>sub</sub>=523 K on SiO<sub>2</sub> substrate.
